# Supplementary material for: The Glomeromycota in the Neotropics
Source: PubMed Central journal article supplement (PMC7835493; doi:10.3389/fmicb.2020.553679), 2021-01-12
Supplement: Table_1.pdf [file Table_1.pdf]

**Supplementary Table for:**

**S.L. Stürmer and K. Kemmelmeier. The Glomeromycota in the Neotropics. Front. Microbiol. 11:553679. doi: 10.3389/fmicb.2020.553679**

Supplementary Table 1. Species of Glomeromycota and heterotypic synonym described from type-specimens originating in the Neotropics.

| <b>Described as:</b>                                    | <b>Changed to:</b>                                            | <b>Authority</b>                                                                                                          | <b>Reference</b>                                                                                                                                                                                        |
|---------------------------------------------------------|---------------------------------------------------------------|---------------------------------------------------------------------------------------------------------------------------|---------------------------------------------------------------------------------------------------------------------------------------------------------------------------------------------------------|
| <i>Pacispora boliviana</i><br><i>Glomus brasilianum</i> | <i>Paraglomus bolivianum</i><br><i>Paraglomus brasilianum</i> | <b>Family Paraglomeraceae</b><br>(Sieverd. & Oehl) Oehl & G.A. Silva<br>(Spain & J. Miranda) J.B. Morton &<br>D. Redecker | Oehl, F. and E Sieverding 2004. J Appl Bot 78:72-82.<br>Spain, J.L. and J.C. de Miranda. 1996. Mycotaxon<br>60:137-142.                                                                                 |
| <i>Paraglomus occidentale</i>                           |                                                               | Corazon-Guivin, G.A. Silva & Oehl                                                                                         | Corazon-Guivin, M. A., Cerna-Mendoza, A.,<br>Guerrero-Abad, J. C., Vallejos-Tapullima, A., Ríos-<br>Ramírez, O., Vallejos-Torres, G., Sota-Ricaldi AM,<br>Santos VM & Oehl, F. 2020. Sydowia 72: 85–94. |
| <i>Paraglomus pernambucanum</i>                         |                                                               | Oehl, C.M. Mello, Magna & G.A.<br>Silva                                                                                   | Mello CMA, Silva GA, Assis DMA, Pontes JS,<br>Ferreira ACA, Leão MPC, Vieira HEE, Maia LC,<br>Oehl F. 2013. J Applied Bot and Food Quality 86:113-<br>125.                                              |
| <i>Acaulospora appendicula</i>                          | <i>Ambispora leptoticha</i>                                   | <b>Family Ambisporaceae</b><br>(N.C. Schenck & G.S. Sm.) R.J. Bills<br>& J.B. Morton                                      | Schenck, N.C.; J.L. Spain; E. Sieverding and R.H.<br>Howeler. 1984. Mycologia, 76:685-699.                                                                                                              |
| <i>Archaeospora ecuadoriana</i>                         |                                                               | <b>Family Archaeosporaceae</b><br>A. Schüßler & C. Walker                                                                 | Schussler A, Walker C. 2019. Mycorrhiza<br>doi.org/10.1007/s00572-019-00913-2.                                                                                                                          |
| <i>Acaulospora myriocarpa</i>                           | <i>Archaeospora<br/>myriocarpa</i>                            | (Spain, Sieverd. & N.C. Schenck)<br>Oehl, G.A. Silva, B.T. Goto &<br>Sieverd.                                             | Schenck, N.C.; J.L. Spain and E. Sieverding. 1986.<br>Mycotaxon, 25:111-117.                                                                                                                            |
| <i>Entrophospora schenckii</i>                          | <i>Archaeospora schenckii</i>                                 | (Sieverd. & S. Toro) C. Walker &<br>Schüßler                                                                              | Sieverding, E. and S. Toro. 1987. Mycotaxon, 28:209-<br>214.                                                                                                                                            |
|                                                         |                                                               | <b>Family Acaulosporaceae</b>                                                                                             |                                                                                                                                                                                                         |

|                                 |                                 |                                                                                                |                                                                                                                                                                      |
|---------------------------------|---------------------------------|------------------------------------------------------------------------------------------------|----------------------------------------------------------------------------------------------------------------------------------------------------------------------|
| <i>Entrophospora colombiana</i> | <i>Acaulospora colombiana</i>   | (Spain & N.C. Schenck)<br>Kaonongbua, J.B. Morton & Bever<br>Corazon-Guivin, Oehl & G.A. Silva | Schenck, N.C.; Spain, J.L.; Sieverding, E.; Howeler,<br>R.H. 1984. Mycologia. 76:685-699                                                                             |
| <i>Acaulospora aspera</i>       |                                 |                                                                                                | Corazon-Guivin MA, Cerna-Mendoza A, Guerrero-<br>Abad JC, Vallejos-Tapullima A, Silva GA, Oehl F.<br>2019. J App Bot and Food Quality 92:250-257.                    |
| <i>Ambispora brasiliensis</i>   | <i>Acaulospora brasiliensis</i> | (B.T. Goto, L.C. Maia & Oehl) C.<br>Walker, M. Krüger & A. Schüßler                            | Goto BT, Maia LC, Oehl F. 2008. Mycotaxon 105:11-<br>18.                                                                                                             |
| <i>Acaulospora denticulata</i>  |                                 | Sieverd. & S. Toro                                                                             | Sieverding, E. and S. Toro. 1987. Angewandte<br>Botanik, 61:217-223.                                                                                                 |
| <i>Acaulospora endographis</i>  |                                 | B.T. Goto                                                                                      | Goto BT, Pereira CMR, Nobre CP, Zatorre NP,<br>Covacevich F, Berbara RLL, Maia LC. 2013.<br>Mycotaxon 123:403-408.                                                   |
| <i>Acaulospora entreriana</i>   |                                 | M.S. Velázquez & Cabello                                                                       | M.S. Velazquez, M. Cabell, G. Irrazabal and A.<br>Godeas. 2008. Mycotaxon, 103:171-187.                                                                              |
| <i>Acaulospora foveata</i>      |                                 | Trappe & Janos                                                                                 | Janos, D.P. and J.M. Trappe 1982. Mycotaxon<br>15:515-522                                                                                                            |
| <i>Acaulospora herrerae</i>     |                                 | Furrazola, B.T. Goto, G.A. Silva,<br>Sieverd. & Oehl                                           | Furrazola E, Goto BT, Silva GA, Torres-Arias Y,<br>Morais T, Lima CEP, Ferreira ACA, Porto MCL,<br>Maia LC, Sieverding E, Oehl F. 2013. Nova<br>Hedwigia. 97:401-413 |
| <i>Acaulospora ignota</i>       |                                 | Błaszcz., Góralska, Chwat & Goto                                                               | Błaszczowski, J; Chwat, G; Góralska, A. 2015.<br>Mycological Progress. 14(4/18):1-11                                                                                 |
| <i>Acaulospora longula</i>      |                                 | Spain & N.C. Schenck                                                                           | Schenck, N.C.; J.L. Spain; E. Sieverding and R.H.<br>Howeler. 1984. Mycologia, 76:685-699.                                                                           |
| <i>Acaulospora mellea</i>       |                                 | Spain & N.C. Schenck                                                                           | Schenck, N.C.; J.L. Spain; E. Sieverding and R.H.<br>Howeler. 1984. Mycologia, 76:685-699.                                                                           |
| <i>Acaulospora morrowiae</i>    |                                 | Spain & N.C. Schenck                                                                           | Schenck, N.C.; J.L. Spain; E. Sieverding and R.H.<br>Howeler. 1984. Mycologia, 76:685-699.                                                                           |

|                                 |                               |                                                                |                                                                                                                                                                                 |
|---------------------------------|-------------------------------|----------------------------------------------------------------|---------------------------------------------------------------------------------------------------------------------------------------------------------------------------------|
| <i>Acaulospora papillosa</i>    |                               | C.M.R. Pereira & Oehl                                          | Pereira CMR, Maia LC, Sanchez-Castro I, Palenzuela J, Silva DKA, Sudová R, Kolarikova Z, Rydlova J, Ctvrtlijova M, Goto BT, Silva GA, Oehl F. 2016. <i>Phytotaxa</i> 260:14-24. |
| <i>Acaulospora reducta</i>      |                               | Oehl, B.T. Goto & C.M.R. Pereira                               | Pereira CMR, Goto BT, Silva DKA, Ferreira ACA, Souza FA, Silva GA, Maia LC, Oehl F. 2015. <i>Mycotaxon</i> 130:983-9995.                                                        |
| <i>Acaulospora rehmi</i>        |                               | Sieverd. & Toro                                                | Sieverding, E.; Toro, S. 1987. <i>Angewandte Botanik</i> . 61:217-223                                                                                                           |
| <i>Acaulospora scrobiculata</i> |                               | Trappe                                                         | Trappe, J.M. 1977. <i>Mycotaxon</i> . 6(2):359-366                                                                                                                              |
| <i>Acaulospora spinulifera</i>  |                               | Oehl, V.M. Santos, J.S. Pontes & G.A. Silva                    | Pontes JS, Santos VM, Pereira CD, Silva GA, Maia LC, Oehl F. 2017. <i>Nova Hedwigia</i> , 105:219-229.                                                                          |
| <i>Acaulospora splendida</i>    |                               | Sieverd., Chaverri & I. Rojas                                  | Sieverding, E.; Chaverri, A.; Rojas, I. 1988. <i>Mycotaxon</i> . 33:251-256                                                                                                     |
| <i>Acaulospora tuberculata</i>  |                               | Janos & Trappe                                                 | Janos, D.P.; Trappe, J.M. 1982. <i>Mycotaxon</i> . 15:515-522                                                                                                                   |
|                                 |                               | <b>Family Diversisporaceae</b>                                 |                                                                                                                                                                                 |
| <i>Corymbioglomus pacificum</i> |                               | Oehl, Medina, P. Cornejo, Sánchez-Castro, G.A. Silva & Palenz. | Medina J, Cornejo P, Borie F, Meier S, Palenzuela J, Vieira HEE, Ferreira ACA, Silva GA, Sánchez-Castro I, Oehl F. 2014. <i>Mycotaxon</i> 127:173-183.                          |
| <i>Diversispora varaderana</i>  |                               | Błaszcz., Chwat, Kovács & Góralaska                            | Błaszczowski, J; Furrázola, E; Chwat, G; Góralaska, A; Lukács, AF; Kovács, GM. 2015. <i>Mycological Progress</i> . 14(11/105):1-12                                              |
| <i>Glomus megalocarpum</i>      | <i>Redeckera megalocarpum</i> | (D. Redecker) C. Walker & A. Schüßler                          | Redecker, D.; Raab, P.; Oehl, F.; Camacho, F.J.; Courtecuisse, R. 2007. <i>Mycological Progress</i> . 6(1):35-44                                                                |

|                                  |                                     |                                                                      |                                                                                                                                                |
|----------------------------------|-------------------------------------|----------------------------------------------------------------------|------------------------------------------------------------------------------------------------------------------------------------------------|
| <i>Glomus pulvinatum</i>         | <i>Redeckera pulvinatum</i>         | (Henn.) C. Walker & A. Schüßler                                      | Thaxter, R. 1922. Proc. Amer. Acad. Sci., 57:291-350.                                                                                          |
| <i>Bulbospora minima</i>         |                                     | <b>Family Gigasporaceae</b><br>Oehl, Marinho, B.T. Goto & G.A. Silva | Marinho F, Silva GA, Ferreira ACA, Veras JSN, Sousa NMF, Goto BT, Maia LC, Oehl F. 2014. Sydowia 66:313-323.                                   |
| <i>Cetraspora auronigra</i>      |                                     | Oehl, L.L. Lima, Kozovits, Magna & G.A. Silva                        | Lima LL, Kozovits AR, Assis DMA, Silva GA, Oehl F. 2014. Sydowia 66:299-308.                                                                   |
| <i>Scutellospora biornata</i>    | <i>Dentiscutata biornata</i>        | (Spain, Sieverd. & S. Toro) Sieverd., F.A. de Souza & Oehl           | Spain, J.L.; E. Sieverding and S. Toro. 1989. Mycotaxon, 35:219-227.                                                                           |
| <i>Scutellospora cerradensis</i> | <i>Dentiscutata cerradensis</i>     | (Spain & J. Miranda) Sieverd., F.A. de Souza & Oehl                  | Spain, J.L. and J.C. de Miranda. 1996. Mycotaxon 60:129-136.                                                                                   |
| <i>Dentiscutata colliculosa</i>  |                                     | B.T. Goto & Oehl                                                     | Goto, B.T.; da Silva, G.A.; Costa Maia, L.; Oehl, F. 2010. Nova Hedwigia. 90(3-4):383-393                                                      |
| <i>Scutellospora savannicola</i> | <i>Dentiscutata savannicola</i>     | (R.A. Herrera & Ferrer) C. Walker & A. Schussler                     | Ferrer R.L and R.A. Herrera. 1981. Rev. Jardin Bot Nacional Habana 1:43-66                                                                     |
| <i>Scutellospora scutata</i>     | <i>Dentiscutata scutata</i>         | (C. Walker & Dieder.) Sieverd., F.A. de Souza & Oehl                 | Walker, C. and C. Diederichs. 1989. Mycotaxon, 35:357-361.                                                                                     |
| <i>Fuscutata aurea</i>           |                                     | Oehl, C.M. Mello & G.A. Silva                                        | Mello CMA, Silva GA, Vieira HEE, Silva IR, Maia LC, Oehl F. 2012. Nova Hedwigia 95:267-275.                                                    |
| <i>Racocetra intraornata</i>     | <i>Intraornatospora intraornata</i> | (B.T. Goto & Oehl) B.T. Goto, Oehl & G.A. Silva                      | Spain, J.L.; E. Sieverding and N.C. Schenck. 1989. Mycotaxon, 34:667-677.                                                                      |
| <i>Paradentiscutata bahiana</i>  |                                     | Oehl, Magna, B.T. Goto & G.A. Silva                                  | Goto BT, Silva GA, Assis DMA, Silva DKA, Souza RG, Ferreira ACA, Jobim K, Mello CMA, Vieira HEE, Maia LC, Oehl F. 2012. Mycotaxon 119:117-132. |
| <i>Paradentiscutata maritima</i> |                                     | B.T. Goto, D.K. Silva, Oehl & G.A. Silva                             | Goto BT, Silva GA, Assis DMA, Silva DKA, Souza RG, Ferreira ACA, Jobim K, Mello CMA, Vieira HEE, Maia LC, Oehl F. 2012. Mycotaxon 119:117-132. |

|                                   |                                 |                                                                                     |                                                                                                                             |
|-----------------------------------|---------------------------------|-------------------------------------------------------------------------------------|-----------------------------------------------------------------------------------------------------------------------------|
| <i>Racocetra crispera</i>         |                                 | F.A. de Souza, I. R. Silva, M.B. Barros-Barreto, B.T. Goto & Oehl                   | Sousa FA, Silva IR, Barreto MBBB, Oehl F, Goto BT, Maia LC. 2018. Mycological Progress do.org/10.1007/s11557-018-1410-9.    |
| <i>Racocetra tropicana</i>        |                                 | Oehl, B.T. Goto & G.A. Silva                                                        | Goto BT, GA Silva, LC Maia, RG Souza, D Coyne, A Tchabi, L Lawouin, F Hountondji and F Oehl. 2011. Nova Hedwigia 92: 69–82. |
| <i>Gigaspora minuta</i>           | <i>Racocetra minuta</i>         | (Ferrer & R.A. Herrera) Oehl, F.A. Souza & Sieverd.                                 | Oehl, F.; Souza, F.A. de; Sieverding, E. 2008. Mycotaxon. 106:311-360                                                       |
| <i>Scutellospora alterata</i>     |                                 | Oehl, J.S. Pontes, Palenz., Sánchez-Castro & G.A. Silva                             | Pontes JS, Sánchez-Castro I, Palenzuela J, Maia LC, Silva GA, Oehl F. 2013. Mycotaxon 125:169-181.                          |
| <i>Scutellospora crenulata</i>    |                                 | R.A. Herrera-Peraza, Cuenca & C. Walker                                             | Herrera-Peraza RA, G Cuenca & C Walker. 2001. Can J Bot 79: 674–678.                                                        |
| <i>Scutellospora pernambucana</i> |                                 | Oehl, D.K Silva, N. Freitas, L.C. Maia                                              | Silva DKA, Freitas NO, Cuenca G, Maia L, Oehl F. 2008. Mycotaxon 106:361-370.                                               |
| <i>Scutellospora rubra</i>        |                                 | Stürmer & J.B. Morton                                                               | Stürmer, S.L. & Morton, J.B. 1999. Mycological Research 103:949-954.                                                        |
| <i>Scutellospora spinosissima</i> |                                 | C. Walker & Cuenca                                                                  | Walker C, Cuenca G, Sanchez F. 1998. Annals of Botany 82:721-725.                                                           |
| <i>Scutellospora striata</i>      |                                 | Cuenca & Herrera                                                                    | Cuenca G, RA Herrera-Peraza. 2008. Mycotaxon, 105-79-87.                                                                    |
| <i>Scutellospora tepuiensis</i>   |                                 | Furrazola & Cuenca                                                                  | Andrade Z, Furrazola E, Cuenca G. 2017. Mycotaxon 132:9-18.                                                                 |
| <i>Gigaspora tricalypta</i>       | <i>Scutellospora tricalypta</i> | (R.A. Herrera & Ferrer) C. Walker & F.E. Sanders                                    | Walker, C.; Sanders, F.E. 1986. Mycotaxon. 27:169-182                                                                       |
| <i>Glomus patagonicum</i>         | <i>Pacispora patagonica</i>     | <b>Family Pacisporaceae</b><br>(Novas & Fracchia) C. Walker, Vestberg & A. Schüßler | Novas, M.V.; Fracchia, S.; Menéndez, A.; Cabral, D.; Godeas, A. 2005. Nova Hedwigia. 80(3-4):533-539                        |

|                                                      |                                                                   |                                                                                                                                                                                                  |
|------------------------------------------------------|-------------------------------------------------------------------|--------------------------------------------------------------------------------------------------------------------------------------------------------------------------------------------------|
| <i>Claroideoglomus hanlinii</i>                      | <b>Family Claroideoglomeraceae</b><br>Błaszcz., Chwat & Góralaska | Błaszczowski, J; Chwat, G; Góralaska, A. 2015.<br>Mycological Progress. 14(4/18):1-11                                                                                                            |
| <i>Funneliglomus sanmartinensis</i>                  | <b>Family Glomeraceae</b><br>Corazon-Guivin, G.A. Silva & Oehl    | Corazon-Guivin MA, Mendoza AC, Guerrero-Adab JC, Vallejos-Tapullima A, Carballar-Hernández S, Silva GA, Oehl F. 2019. Sydowia 71:17-24.                                                          |
| <i>Glomus brohultii</i>                              | R.A. Herrera, Ferrer & Sieverd.                                   | Herrera-Peraza, R. A., Ferrer, R. L., & Sieverding, E. (2003). Journal of Applied Botany: 77(1/2), 37-40.                                                                                        |
| <i>Glomus crenatum</i>                               | Furrazola, R.L. Ferrer, R.A. Herrera & B.T. Goto                  | Furrazola, E.; Torres-Arias, Y.; Ferrer, R.L.; Herrera, R.A.; Berbara, R.L.L.; Goto, B.T. 2011. Mycotaxon. 116:143-149                                                                           |
| <i>Glomus cubense</i>                                | Y. Rodr. & Dalpé                                                  | Rodríguez, Y.; Dalpé, Y.; Séguin, S.; Fernández, K.; Fernández, F.; Rivera, R.A. 2011. Mycotaxon. 118:337-347                                                                                    |
| <i>Glomus fuegianum</i>                              | (Speg.) Trappe & Gerd.                                            | Thaxter, R. 1922. Proc. Amer. Acad. Arts Sci., 57:291-350.                                                                                                                                       |
| <i>Glomus glomerulatum</i><br><i>Glomus herrerae</i> | Sieverd.<br>Torres-Arias, E. Furrazola & B.T. Goto                | Sieverding, E. 1987. Mycotaxon, 29:73-79.<br>Torres-Arias, Y; Furrazola, E; Berbara, RLL; Jobim, K; Lima, JLR; Goto, BT. 2017. Current Research in Environmental & Applied Mycology 7(3):155-160 |
| <i>Glomus trufemii</i>                               | B.T. Goto, G. A. Silva & Oehl                                     | Goto BT, Jardim JG, Silva GA, Furrazola E, Torres-Arias Y, Oehl F. 2012. Mycotaxon 120:1-9.                                                                                                      |
| <i>Glomus segmentatum</i>                            | Trappe, Spooner & Ivory                                           | Trappe, J.M. 1979. Transactions of the British Mycological Society. 73(2):361-362                                                                                                                |

|                                                          |                                |                                                                 |                                                                                                                                                                                      |
|----------------------------------------------------------|--------------------------------|-----------------------------------------------------------------|--------------------------------------------------------------------------------------------------------------------------------------------------------------------------------------|
| <i>Microkamienskia peruviana</i>                         |                                | Corazon-Guivin, G.A. Silva & Oehl                               | Corazon-Guivin MA, Cerna-Mendoza A, Guerrero-Abad JC, Vallejos-Tapullima A, Carballar-Hernández S, Silva GA, Oehl F. 2019. Nova Hedwigia 10.1127/nova-hedwigia/2019/0551             |
| <i>Nanoglomus plukenetiae</i>                            |                                | Corazon-Guivin, G.A. Silva & Oehl                               | Corazon-Guivin MA, Cerna-Mendoza A, Guerrero-Abad JC, Vallejos-Tapullima A, Carballar-Hernandez S, Silva GA, Oehl F. 2019. Mycological Progress 18:1395-1409.                        |
| <i>Rhizoglomus maiae</i>                                 |                                | Błaszcz., Piątek, Yorou, Zubek, Jobim, Niezgoda & B.T. Goto     | Blaszkowski J, Niezgoda P, Piatek M, Magruno F, Malicka M, Zubek S, Mleczko P, Yorou NS, Jobim K, Vista XM, Lima JLR, Goto BT. 2019. Mycologia doi.org/10.1080/00275514.2019.1654637 |
| <i>Rhizoglomus variabile</i><br><i>Glomus proliferum</i> | <i>Rhizophagus proliferus</i>  | Corazon-Guivin, Oehl & G.A. Silva Dalpé & Declerck              | Song J et al. 2019. Sydowia 71:141-245. Declerck, S.; Cranenbrouck, S.; Dalpé, Y.; Séguin, S.; Grandmougin-Ferjani, A.; Fontaine, J.; Sancholle, M. 2000. Mycologia. 92(8):1178-1187 |
| <i>Glomus manihotis</i>                                  | <i>Rhizophagus manihotis</i>   | (R.H. Howeler, Sieverd. & N.C. Schenck) C. Walker & A. Schüßler | Schenck, N.C.; J.L. Spain; E. Sieverding and R.H. Howeler. 1984. Mycologia, 76:685-699.                                                                                              |
| <i>Rhizophagus natalensis</i>                            |                                | Błaszcz., Chwat & B.T. Goto                                     | Blaszkowski J, Chwat G, Góralska A, Goto BT. 2014. Mycotaxon 129:97-108.                                                                                                             |
| <i>Sclerocarpum amazonicum</i>                           |                                | Jobim, Błaszcz., Niezgoda, Kozłowska & B.T. Goto                | Jobim K, Blaszkowski J, Niezgoda P, Kozłowska A, Zubek S, Mleczko P, Chachula P, Ishikawa NK, Goto BT. 2019. Mycological Progress 18:369-384.                                        |
| <i>Sclerocystis clavispora</i>                           |                                | Trappe                                                          | Trappe, J.M. 1977. Mycotaxon. 6(2):359-366                                                                                                                                           |
| <i>Glomus constrictum</i>                                | <i>Septoglomus constrictum</i> | (Trappe) Sieverd., G.A. Silva & Oehl                            | Trappe, J.M. 1977. Mycotaxon. 6(2):359-366                                                                                                                                           |

|                                 |                                 |                                                                |                                                                                                                                           |
|---------------------------------|---------------------------------|----------------------------------------------------------------|-------------------------------------------------------------------------------------------------------------------------------------------|
| <i>Septoglomus furcatum</i>     |                                 | Blaszk., Chwat, Kovács & Ryszka                                | Blaszkowski J, Chwat G, Kovács GM, Gáspár BK, Ryszka P, Orłowska E, Pagano MC, Araújo FS, Wubet T, Buscot F. 2013. Mycologia 105:670-680. |
| <i>Septoglomus titan</i>        |                                 | B.T. Goto & G.A. Silva                                         | Goto BT, Araújo AF, Soares ACF, Ferreira ACA, Maia LC, Sousa CS, Silva GA. 2013. Mycotaxon 124:101-109.                                   |
| <b>Heterotypic Synonym</b>      |                                 |                                                                |                                                                                                                                           |
| <i>Fuscutata heterogama</i>     | <i>Dentiscutata heterogama</i>  | (T.H. Nicolson & Gerd.) Oehl, F.A. Souza, L.C. Maia & Sieverd. | Oehl F, Souza FA, Sieverding E. 2008. Mycotaxon. 106:311-360                                                                              |
| <i>Gigaspora ramisporophora</i> | <i>Gigaspora margarita</i>      | Spain, Sieverd. & N.C. Schenck                                 | Bentivenga SP, Morton JB. 1995. Mycologia 87:719-731                                                                                      |
| <i>Endogone lignicola</i>       | <i>Redeckera fulva</i>          | Pat.                                                           | Patouillard NT. 1902. Bulletin de la Société Mycologique de France. 18(2):171-186                                                         |
| <i>Endogone moelleri</i>        | <i>Redeckera fulva</i>          | Henn.                                                          | Hennings P. 1897. Hedwigia. 36:190-246                                                                                                    |
| <i>Ackermannia coccogena</i>    | <i>Sclerocystis coremioides</i> | Pat.                                                           | Patouillard NT. 1902. Bulletin de la Société Mycologique de France. 18(2):171-186                                                         |
| <i>Ackermannia dussi</i>        | <i>Sclerocystis coremioides</i> | Pat.                                                           | Patouillard NT. 1902. Bulletin de la Société Mycologique de France. 18(2):171-186                                                         |
