# Supplementary material for: The Glomeromycota in the Neotropics
Source: PubMed Central journal article supplement (PMC7835493; doi:10.3389/fmicb.2020.553679), 2021-01-12
Supplement: Table_2.pdf [file Table_2.pdf]

**Supplementary Table for:****S.L. Stürmer and K. Kemmelmeier. The Glomeromycota in the Neotropics. *Front. Microbiol.* 11:553679. doi: 10.3389/fmicb.2020.553679**

Supplementary Table 2. Records of Glomeromycota from Neotropics according to taxonomic category and countries.

| <b>Country</b> | <b>Records</b> | <b>Species</b> | <b>Genera</b> | <b>Families</b> | <b>Orders</b> |
|----------------|----------------|----------------|---------------|-----------------|---------------|
| Argentina      | 716            | 77             | 20            | 9               | 4             |
| Bolivia        | 70             | 20             | 11            | 6               | 3             |
| Brazil         | 2836           | 182            | 32            | 11              | 4             |
| Chile          | 207            | 58             | 19            | 9               | 4             |
| Colombia       | 232            | 77             | 19            | 8               | 4             |
| Equador        | 76             | 28             | 12            | 7               | 4             |
| Peru           | 105            | 52             | 19            | 9               | 4             |
| Venezuela      | 53             | 37             | 17            | 7               | 4             |
| Belize         | 1              | 1              | 1             | 1               | 1             |
| Costa Rica     | 85             | 42             | 18            | 7               | 3             |
| Cuba           | 66             | 39             | 16            | 7               | 4             |
| Guadaloupe     | 22             | 22             | 15            | 7               | 4             |
| Guatemala      | 8              | 8              | 4             | 3               | 2             |
| Honduras       | 12             | 12             | 7             | 5               | 3             |
| Jamaica        | 8              | 3              | 2             | 1               | 1             |
| Martinique     | 3              | 3              | 3             | 2               | 2             |
| Mexico         | 463            | 87             | 21            | 10              | 4             |
| Nicaragua      | 10             | 6              | 4             | 4               | 3             |
| Panama         | 6              | 6              | 4             | 2               | 2             |
