# Supplementary material for: The Glomeromycota in the Neotropics
Source: PubMed Central journal article supplement (PMC7835493; doi:10.3389/fmicb.2020.553679), 2021-01-12
Supplement: Table_3.pdf [file Table_3.pdf]

**Supplementary Table for:****S.L. Stürmer and K. Kemmelmeier. The Glomeromycota in the Neotropics. *Front. Microbiol.* 11:553679. doi: 10.3389/fmicb.2020.553679**

Supplementary Table 3. Number of species, genera and families of Glomeromycota in ecoregions of the Neotropics.

| <b>Ecoregions</b>                           | <b>Species</b> | <b>Genera</b> | <b>Families</b> | <b>Country</b>   |
|---------------------------------------------|----------------|---------------|-----------------|------------------|
| Alto Paraná Atlantic Forest                 | 60             | 20            | 8               | Brazil           |
| Amazon-Orinoco-Southern Caribbean mangroves | 15             | 7             | 3               | Brazil           |
| Araucaria moist forest                      | 12             | 9             | 5               | Brazil           |
| Araya and Paria xeric scrub                 | 19             | 14            | 6               | Venezuela        |
| Atlantic Coast restingas                    | 36             | 15            | 6               | Brazil           |
| Bahamian-Antillean mangroves                | 32             | 17            | 8               | Cuba, Guadeloupe |
| Bahia Coastal forests                       | 17             | 12            | 6               | Brazil           |
| Bahia interior forests                      | 59             | 17            | 8               | Brazil           |
| Bolivian montane dry forests                | 19             | 10            | 5               | Bolivia          |
| Brazilian Atlantic dry forests              | 10             | 5             | 4               | Brazil           |
| Caatinga                                    | 99             | 25            | 10              | Brazil           |
| Campos Rupestres montane savanna            | 33             | 11            | 6               | Brazil           |
| Cauca Valley montane forests                | 66             | 19            | 8               | Colombia         |
| Central American pine-oak forests           | 14             | 8             | 5               | Mexico           |
| Central Andean dry puna                     | 15             | 9             | 5               | Bolivia          |
| Central Andean Puna                         | 18             | 10            | 5               | Bolivia          |
| Cerrado                                     | 92             | 23            | 9               | Brazil           |
| Chilean Matorral                            | 30             | 16            | 9               | Chile            |
| Costa Rican seasonal moist forests          | 1              | 1             | 1               | Costa Rica       |
| Cuban cactus scrub                          | 1              | 1             | 1               | Cuba             |
| Cuban dry forests                           | 24             | 13            | 6               | Cuba             |
| Cuban moist forests                         | 2              | 2             | 1               | Cuba             |
| Cuban pine forests                          | 12             | 8             | 3               | Cuba             |
| Dry Chaco                                   | 47             | 15            | 8               | Argentina        |

|                                                  |    |    |    |                    |
|--------------------------------------------------|----|----|----|--------------------|
| Espinal                                          | 52 | 18 | 8  | Argentina          |
| Fernando de Noronha-Atol das Rocas moist forests | 7  | 6  | 4  | Brazil             |
| Guianan savanna                                  | 21 | 9  | 5  | Brazil             |
| High Monte                                       | 1  | 1  | 1  | Argentina          |
| Humid Pampas                                     | 40 | 16 | 7  | Argentina          |
| Isthmian-Atlantic moist forests                  | 5  | 3  | 2  | Costa Rica, Panama |
| Jacurá-Solimões-Negro moist forests              | 25 | 14 | 7  | Brazil             |
| Magdalena Valley montane forests                 | 2  | 2  | 2  | Colombia           |
| Magellanic subpolar forests                      | 1  | 1  | 1  | Argentina          |
| Mesoamerican Gulf-Caribbean mangroves            | 22 | 12 | 6  | Mexico             |
| Oaxacan montane forests                          | 24 | 12 | 5  | Mexico             |
| Pantanal                                         | 19 | 11 | 6  | Brazil             |
| Patagonian steppe                                | 18 | 9  | 6  | Argentina          |
| Pernambuco coastal forests                       | 33 | 14 | 7  | Brazil             |
| Pernambuco interior forests                      | 48 | 18 | 6  | Brazil             |
| Petén-Veracruz moist forests                     | 29 | 14 | 7  | Mexico             |
| Serra do Mar coastal forests                     | 87 | 21 | 9  | Brazil             |
| Sierra de los Tuxtlas                            | 39 | 18 | 10 | Mexico             |
| Sierra Madre de Chiapas moist forests            | 15 | 5  | 4  | Mexico             |
| Sierra Madre de Oaxaca pine-oak forests          | 4  | 4  | 3  | Mexico             |
| Sierra Madre del Sur pine-oak forests            | 7  | 5  | 3  | Mexico             |
| Southern Atlantic Brazilian mangroves            | 9  | 6  | 5  | Brazil             |
| Southern Pacific dry forests                     | 35 | 15 | 8  | Mexico             |
| Southwest Amazon moist forests                   | 22 | 10 | 6  | Brazil             |
| Talamancan montane forests                       | 17 | 11 | 6  | Costa Rica         |
| Uatumã-Trombetas moist forests                   | 50 | 18 | 9  | Brazil             |
| Uruguayan savanna                                | 11 | 8  | 4  | Brazil             |
| Valdivian temperate forests                      | 51 | 18 | 9  | Argentina, Chile   |
